# Supplementary material
Source: PubMed Central journal article supplement (PMC8805993)
Supplement: NIHMS1769877-supplement-Supplementary_Figures.pdf [file NIHMS1769877-supplement-Supplementary_Figures.pdf]

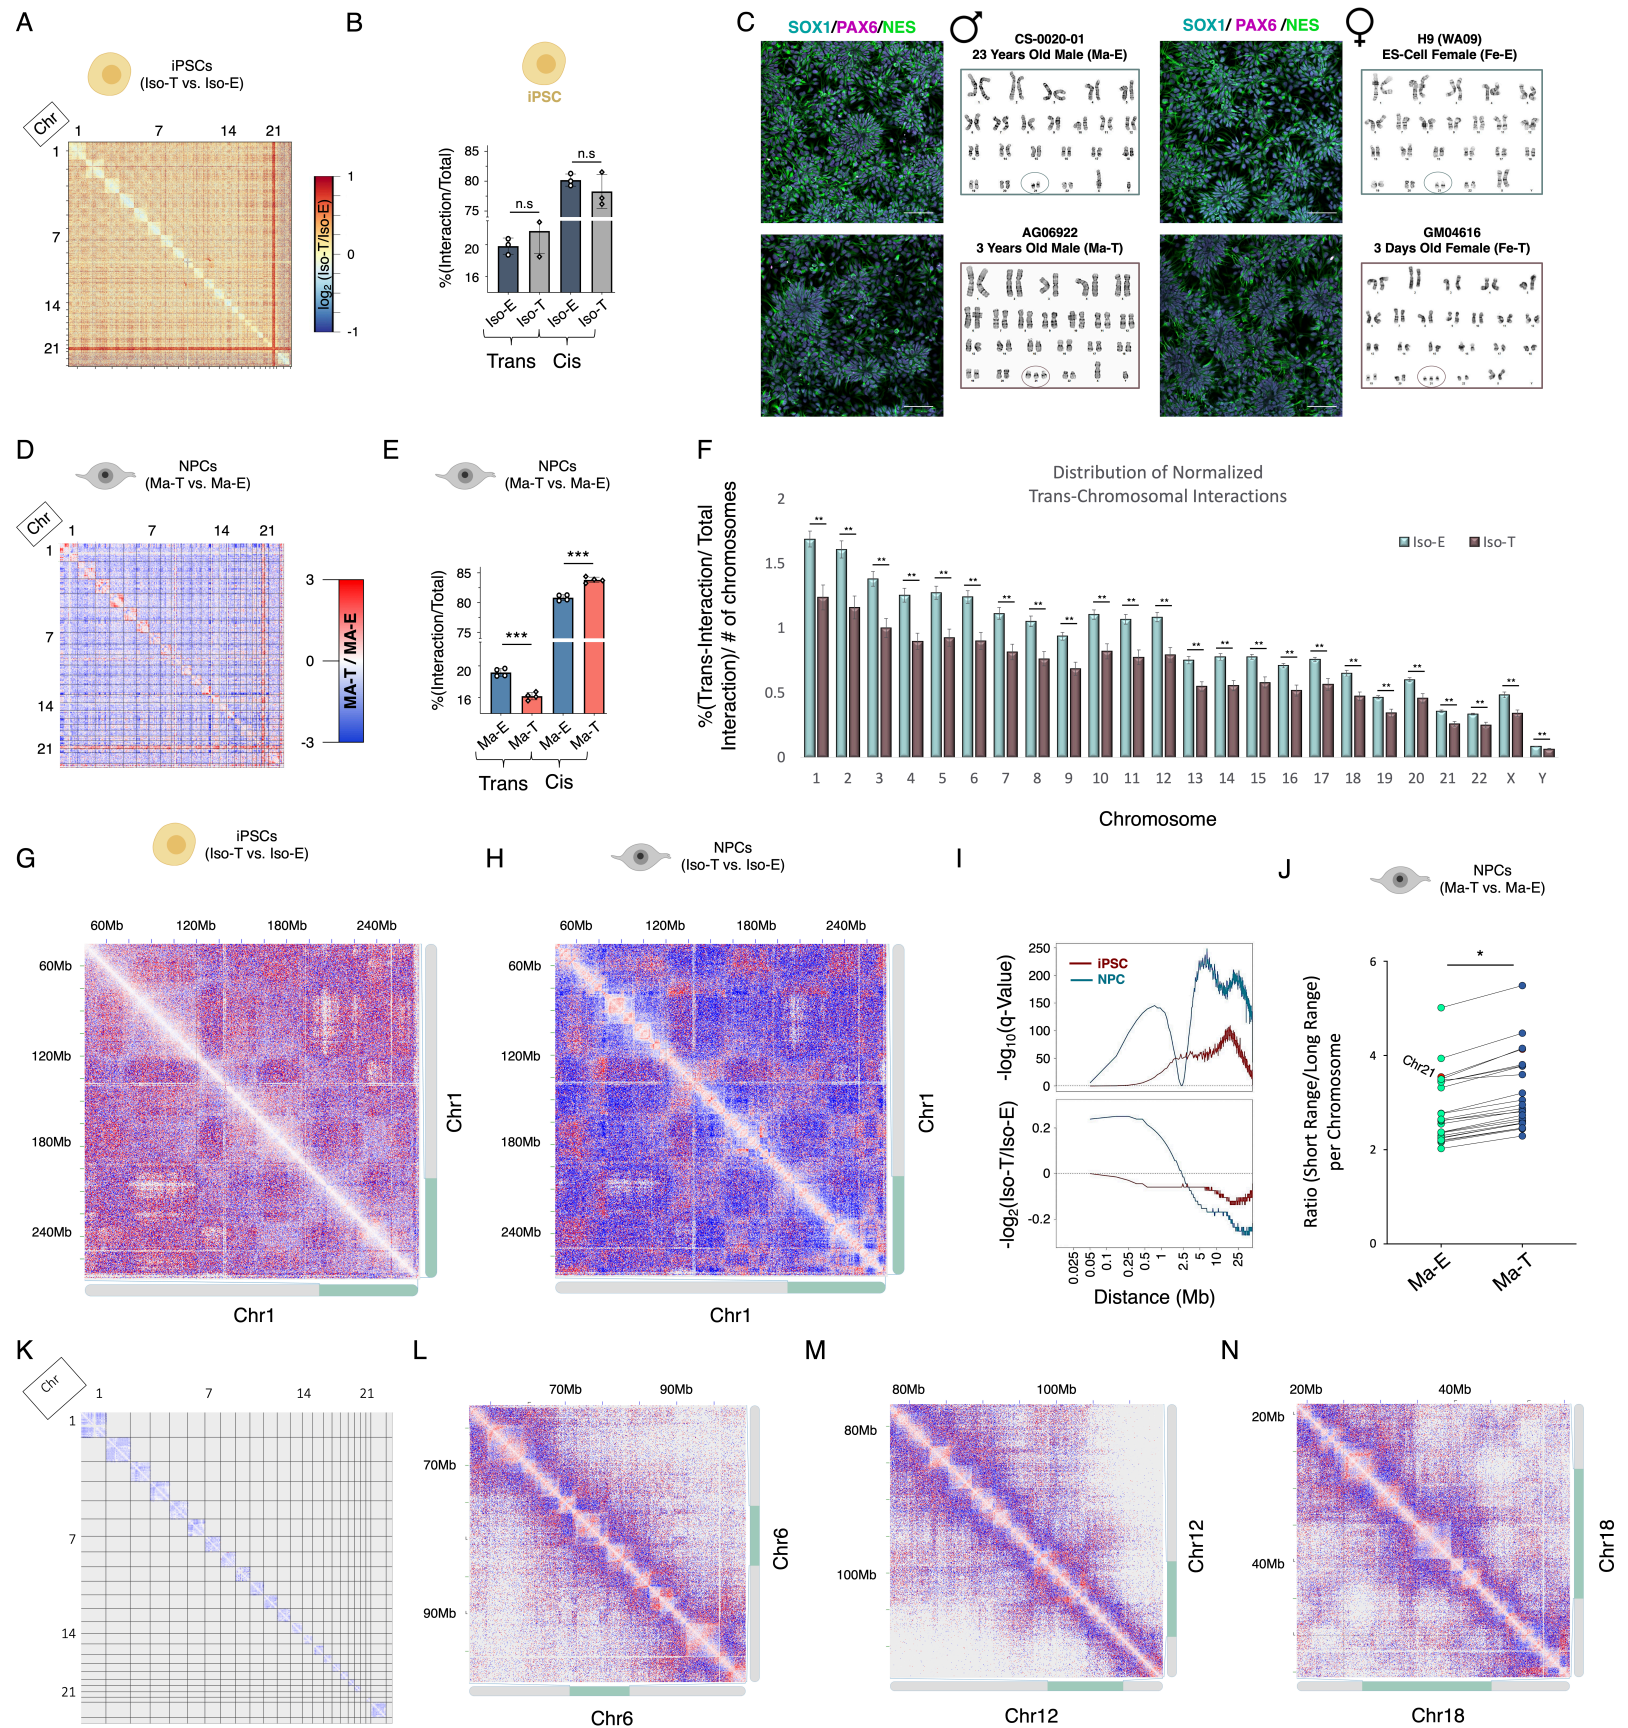



**Figure S1 – T21 induces genome-wide chromosomal introversion in NPCs, Related to Figure 1.** (A) Genome-wide differential (Iso-T/Iso-E) Hi-C interaction maps for iPSCs. (B) Percent distribution of trans- and cis-chromosomal interactions for the isogenic pair of iPSCs. (C) Left panels: Staining of NPCs for SOX1 (cyan), PAX6 (magenta) and Nestin (green) from the euploid male (Ma-E, top left) and trisomic male (Ma-T, bottom left). Right panels: G-band karyotyping of euploid male (Ma-E, top right) and trisomic male (Ma-T, bottom right) NPCs. Right panel: Staining of NPCs (left) from the euploid female (Fe-E, top left) and a trisomic female (Fe-T, bottom left) as well as the respective G-band karyotyping of the female NPCs on the right. (D) Genome-wide differential (Ma-T/Ma-E) Hi-C interaction maps for the male pair of NPCs. (E) Percent distribution of trans- and cis-chromosomal interactions for the male pair (Ma-E and Ma-T) of NPCs. (F) Percent distribution of trans-chromosomal interactions per chromosome for the isogenic pair of NPCs (Iso-E and Iso-T) normalized by the number of chromosomes. (G, H) Representative images of the differential (Iso-T/Iso-E) cis-chromosomal Hi-C interaction maps of chromosome 1 (chr1) for the isogenic pair of iPSCs (G) and NPCs (H). (I) Bottom panel shows the fold change ( $\log_2$ ) of the long-range interaction distribution (y-axis) plotted against the distance of chromatin interactions (x-axis) for the isogenic pair of iPSCs (red) and NPCs (teal) as well as the adjusted p-value (top panel). (J) Dot plots representing the ratio of short-range (<1Mb) to long-range (>1Mb) interactions for the male pair of NPCs (Ma-E and Ma-T). Each dot represents a chromosome and chr21 is represented as a red dot. Wilcoxon rank-sum test shows that trisomic NPCs have significantly increased short range interactions in as compared to the euploid NPCs (p-value=0.043). (L-N) Analysis of genome-wide cis chromosomal interactions without chromosome 21 pre normalization. (K-N) Differential (Iso-T/Iso-E) cis-chromosomal interaction map for the isogenic pair of NPCs, genome-wide (K), chromosome 6 (L), chromosome 12 (M) and chromosome 18 (N).



A

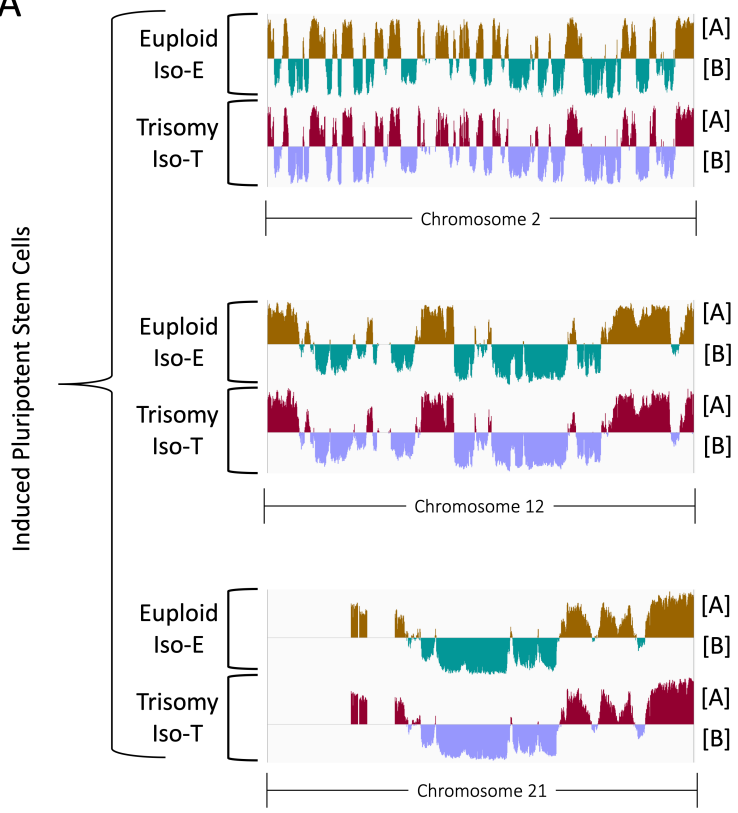

B

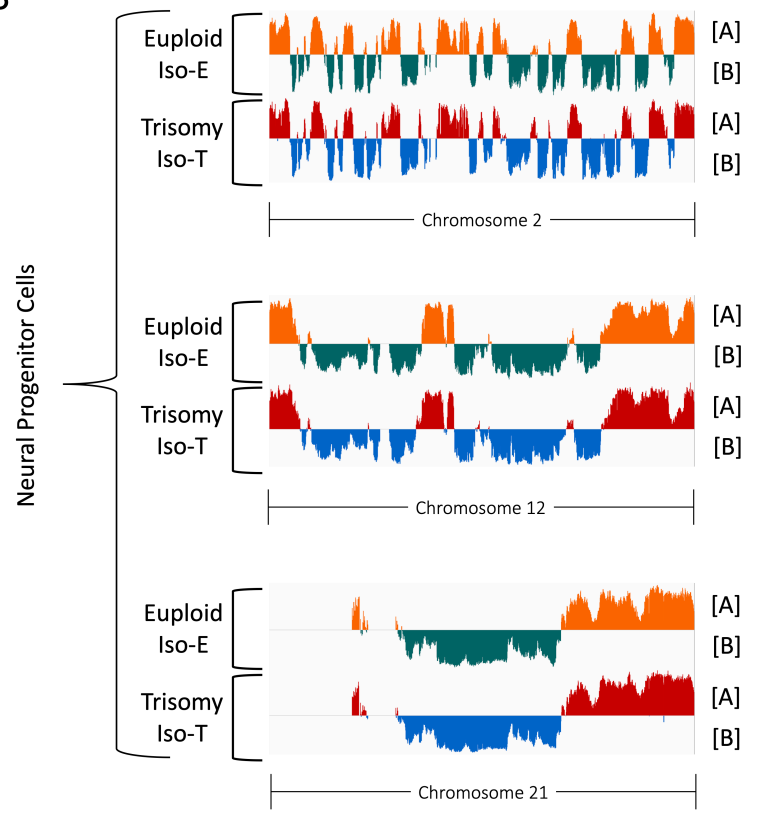

C

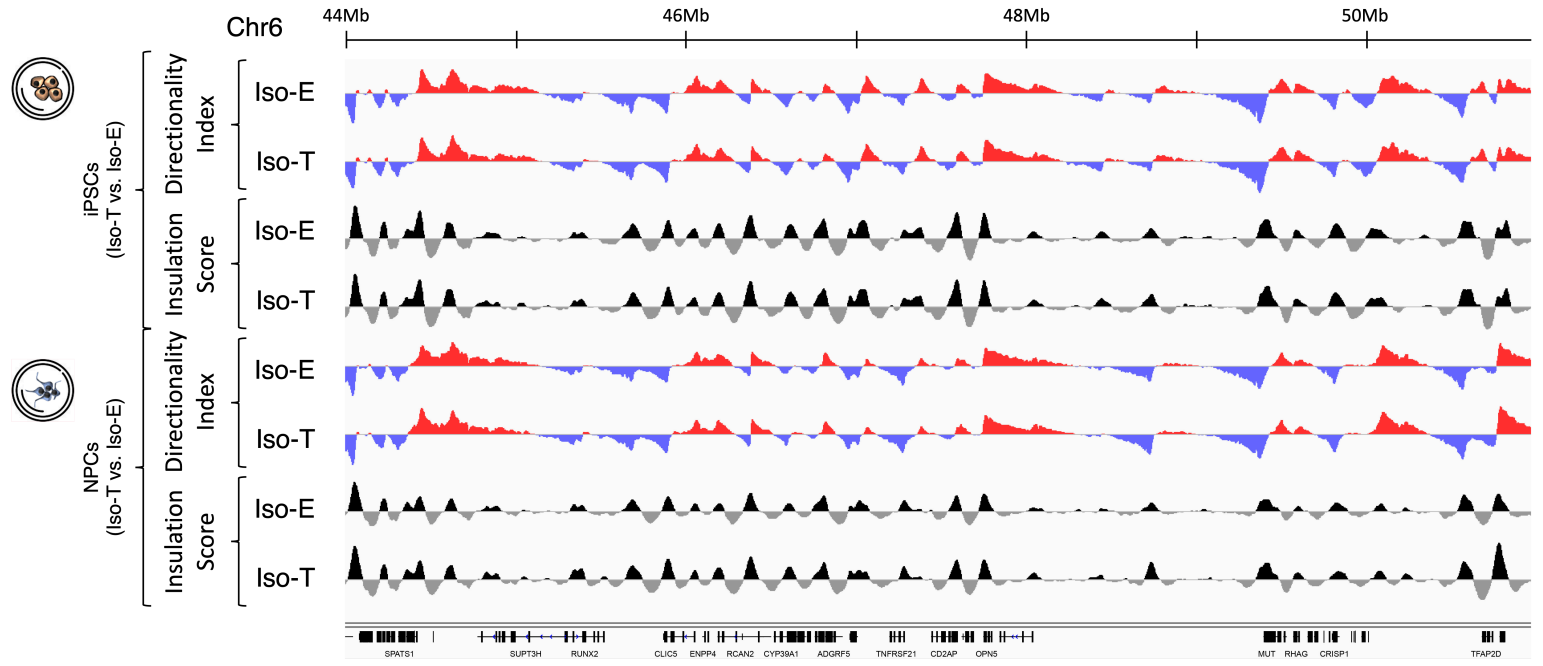

D

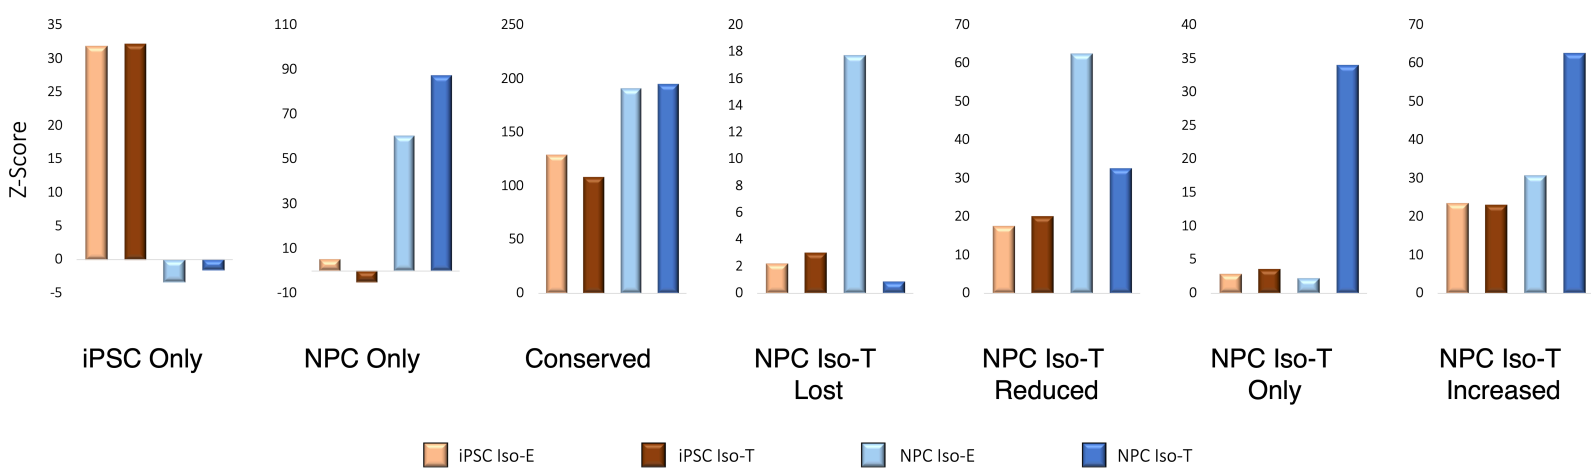



**Figure S2 – Consequences of T21 on A/B compartments, TADs and chromosomal loops, Related to Figure 2.**

(A, B) Representative images of A/B compartments identified through principal component analysis from chromosome 2, 12 and 21 of the isogenic pair (Iso-E and Iso-T) of iPSCs (A) and NPCs (B). (C) Representative IGV plots of TAD directionality index and insulation scores from chromosome 6 for the isogenic pair (Iso-E and Iso-T) of iPSCs and NPCs. (D) Histogram of the z-score of aggregate plot analysis of the genome-wide chromosomal looping identified only in iPSCs or NPCs as well as loops that are conserved in euploid and T21, loops lost/reduced in T21-NPCs and gained/increased in T21-NPCs. Histogram bars are colored beige (Iso-E iPSCs), brown (Iso-T iPSCs), light-blue (Iso-E NPCs) and blue (Iso-T NPCs).



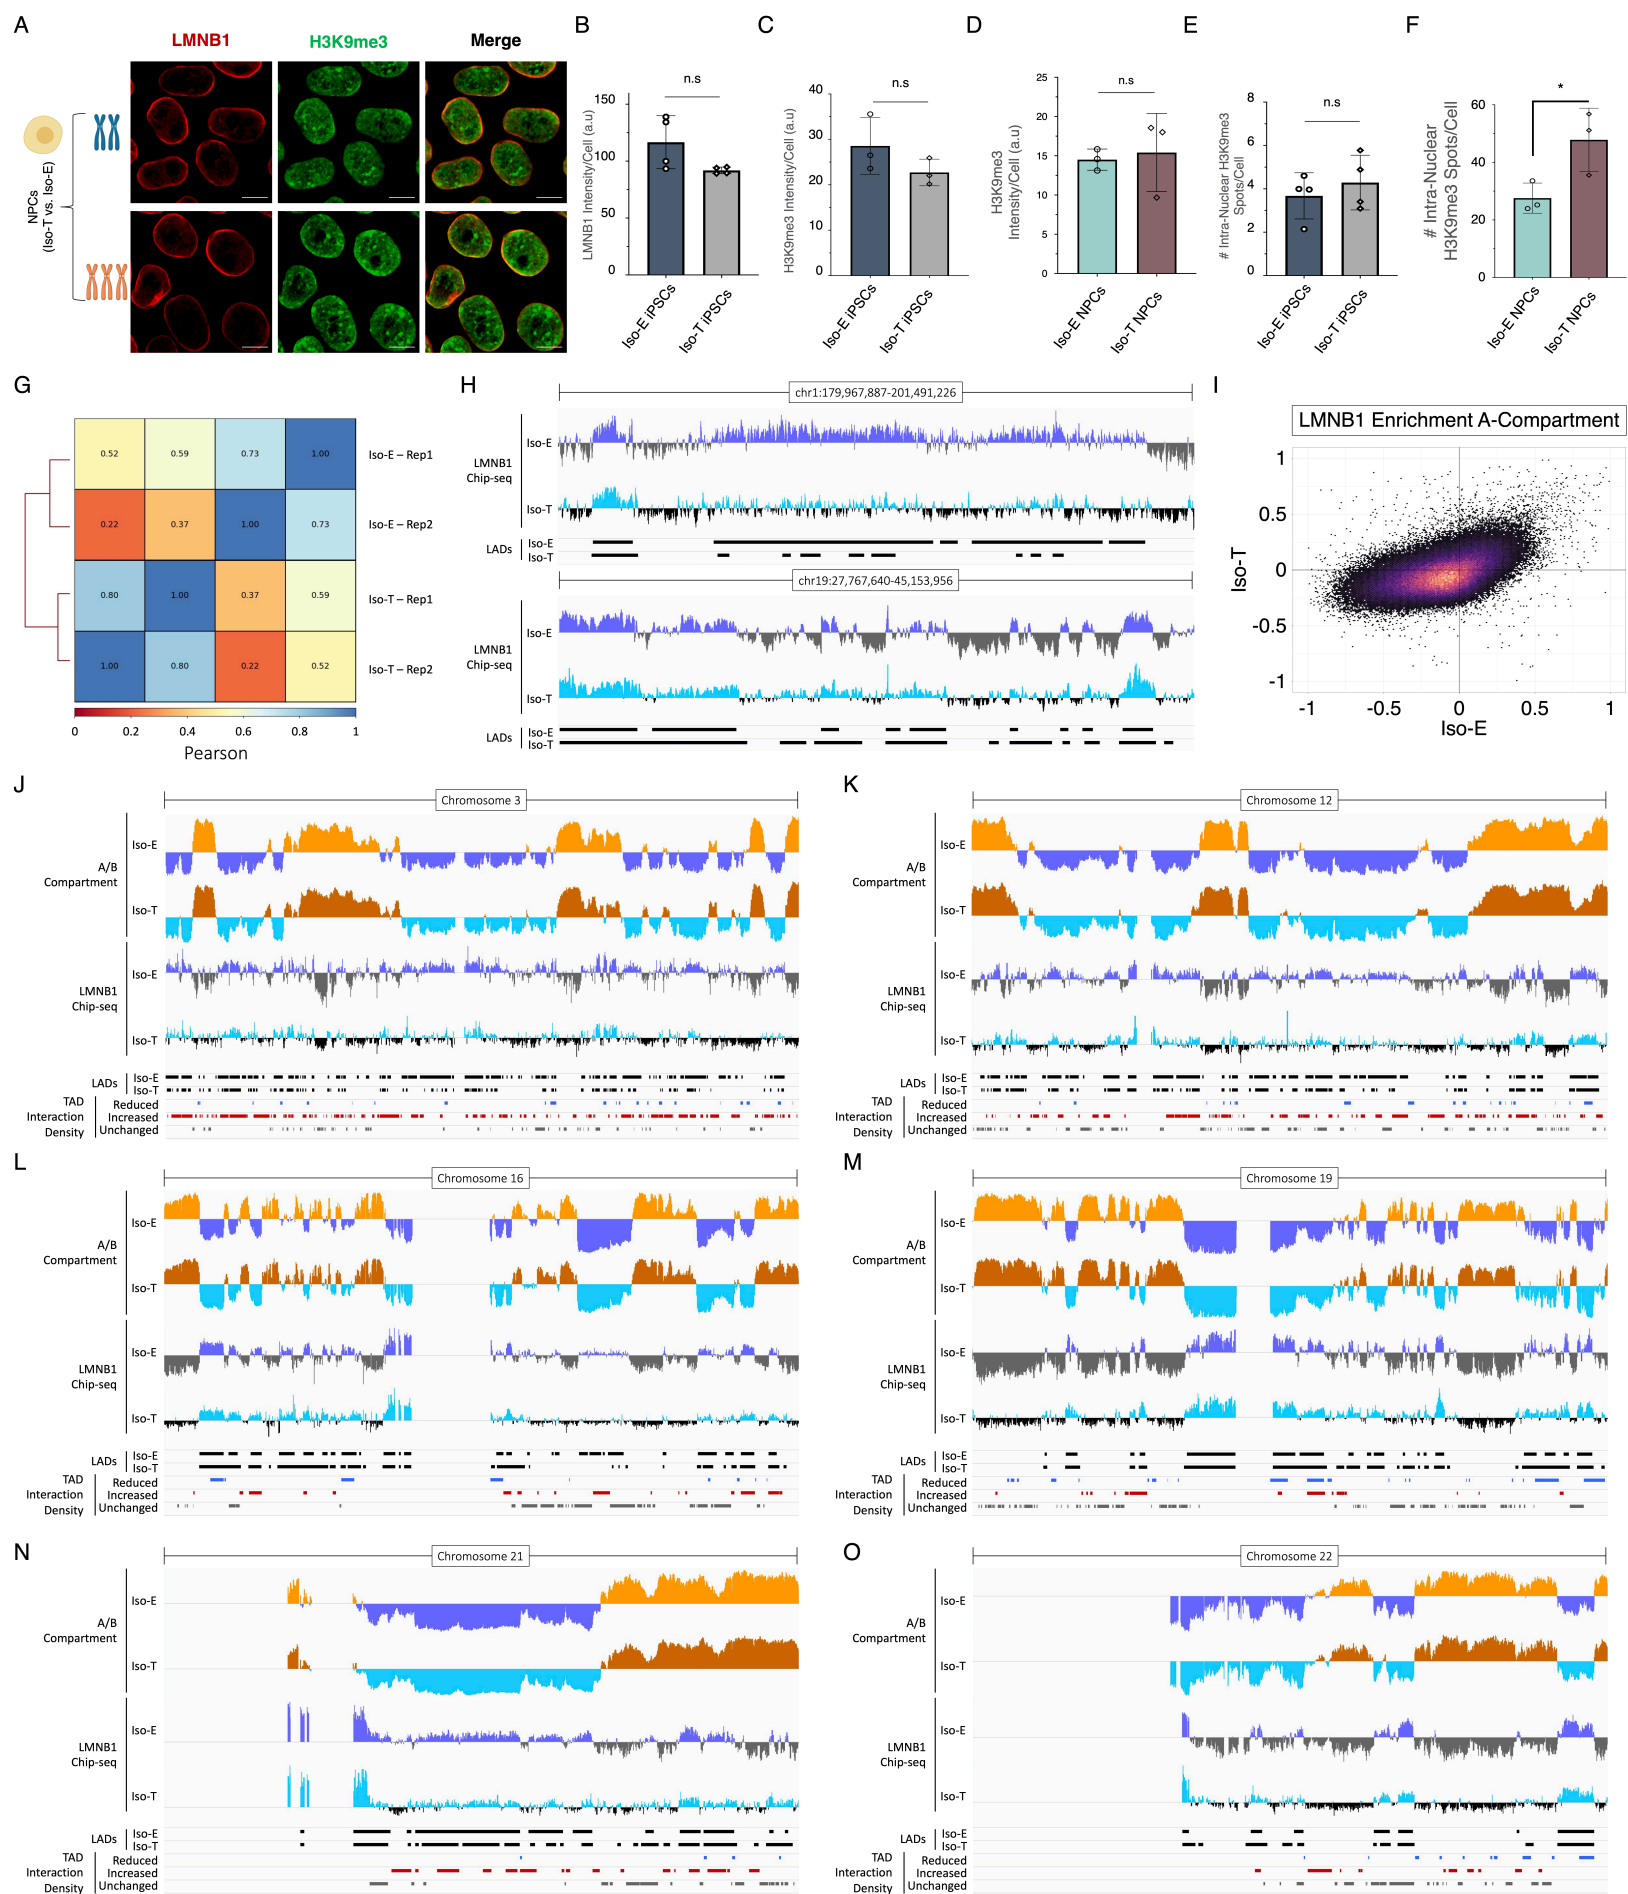



**Figure S3 – T21 induced disruption of the nuclear lamina in NPCs, Related to Figure 3. (A)**

Immunofluorescence of H3K9me3 (green) and LMNB1 (red) in Iso-E and Iso-T iPSCs. (B) Quantification of LMNB1 staining intensity in the isogenic pair of NPCs. Each dot on the histogram represents a replicate experiment of ~2,500 total nuclei analyzed for the isogenic pair of iPSCs. (C) Quantification of H3K9me3 staining intensity in the isogenic pair of NPCs. (D) Quantification of H3K9me3 staining intensity in the isogenic pair of NPCs. Each dot on the histogram represents a replicate experiment of ~440 total nuclei analyzed for the isogenic pair of NPCs. (E, F) Quantification of the number of H3K9me3 spots that are not colocalized with LMNB1 in Iso-E and Iso-T iPSCs (E) and NPCs (F). (G) Heatmap and histogram of the Pearson correlation of the replicates for LMNB1 ChIP-seq experiments from Iso-E and Iso-T NPCs. (H) IGV plot of LMNB1 ChIP-seq of Iso-E (blue) and Iso-T (light-blue) of region of chromosome 1 (top) and chromosome 19 (bottom). (I) Scatter plot of LMNB1 enrichment over input in Iso-E (x-axis) and Iso-T (y-axis) of the genomic region in the B-compartment. (J-O) IGV plot of A-compartment (Iso-E (yellow) and Iso-T (orange)) and B-compartment (Iso-E (blue) and Iso-T (light-blue)), LMNB1 ChIP-seq of Iso-E (blue) and Iso-T (light-blue), as well as the location of LADs (black) and the differentially interacting TADs (reduced-ID (blue), increased-ID (red) and unchanged-ID (gray)) an 87Mb region of chromosome 3 (J), chromosome 12 (K), chromosome 16 (L), chromosome 19 (M), chromosome 21 (N) and chromosome 22 (O).

A

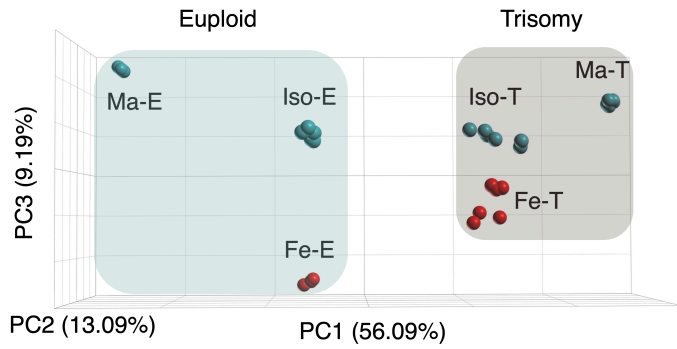

B

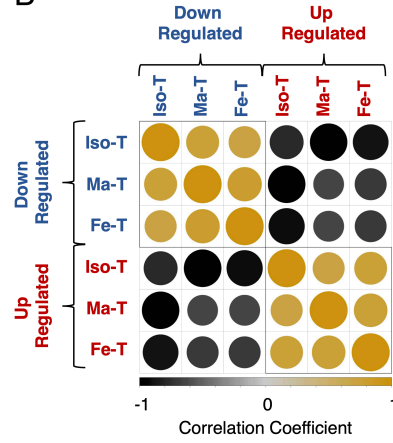

C

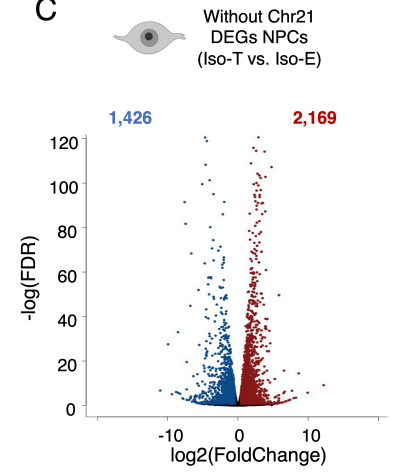

D

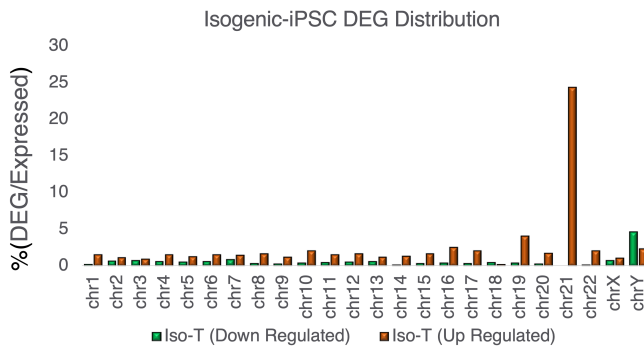

E

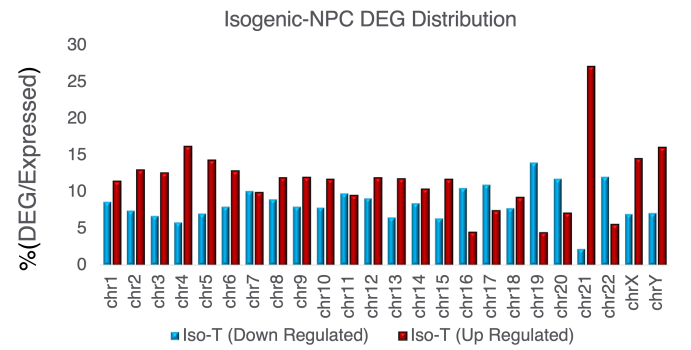

F

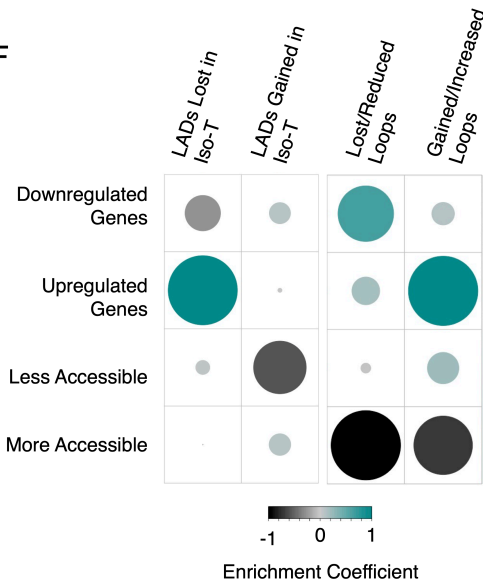

G

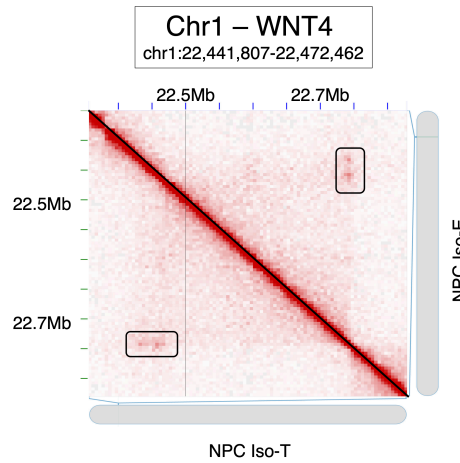

H

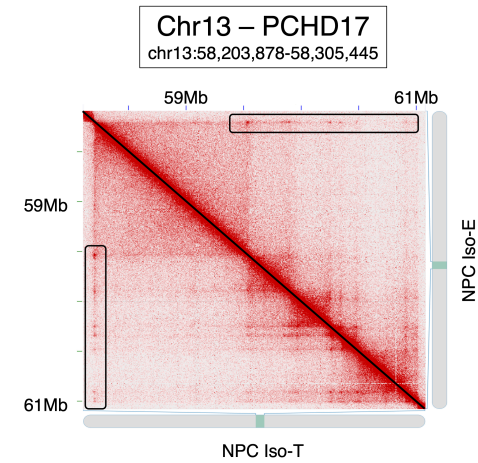

I

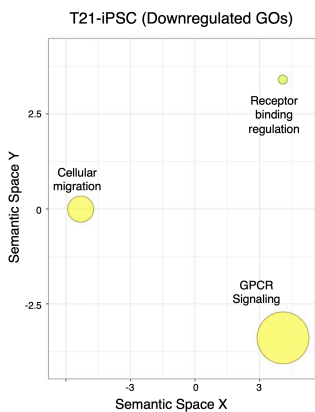

J

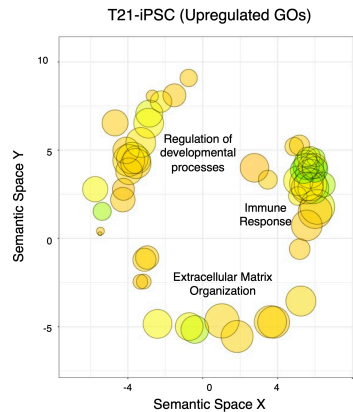

K

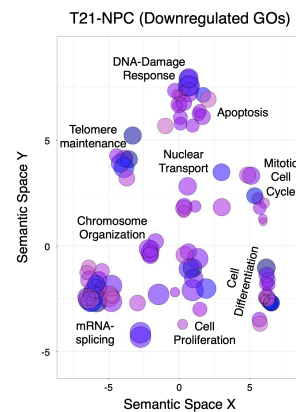

L

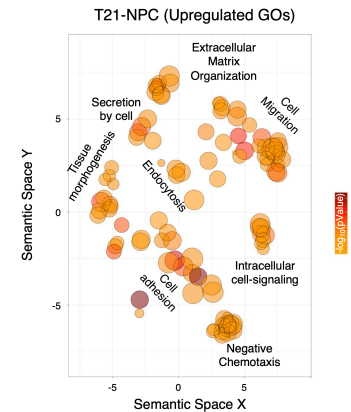

**Figure S4 – T21 induced differential TAD-interactions are correlated with DEGs in NPCs, Related to Figure 4.** (A) Principal component analysis (PCA) identified separation by karyotype for the male (teal) and female (red) euploid and trisomic NPCs. (B) Randomized permutation test represented as a correlation heatmap of downregulated (blue) and upregulated (red) genes identified in T21 NPCs. Color intensity (positive correlations are displayed in yellow and negative correlations in black) and the size of the circle are proportional to the correlation coefficients of the DEGs induced by T21 in the NPCs identified through pairwise comparisons (Iso-T vs. Iso-E, Ma-T vs. Ma-E and Fe-T vs Fe-E). (C) Volcano plots of the differentially expressed genes (DEGs) identified genome-wide in the isogenic pair of NPCs where the data was normalized and processed in the absence of genes from chromosome 21. (D, E) Histogram of the percent DEG distribution per chromosome for the isogenic pair of iPSCs (D) and NPCs (E). (F) Enrichment plot of the randomized permutation test between DEGs and DARs with LADs that are lost or gained in NPCs harboring T21 as well as with differentially looped genes. Color intensity (positive correlations are displayed in green and negative correlations in black) and the size of the circle are proportional to the enrichment coefficients. (G, H) Representative Hi-C interaction maps depicting chromosomal loops that are lost (G) or gained (H) in T21-NPCs (Iso-T, bottom half over diagonal line) as compared to euploid NPCs (Iso-E, top half over diagonal line). (I-L) Gene ontology visualized in semantic similarity-based scatterplots for downregulated and upregulated genes identified in iPSCs (I, J) and NPCs (K, L).

**A**

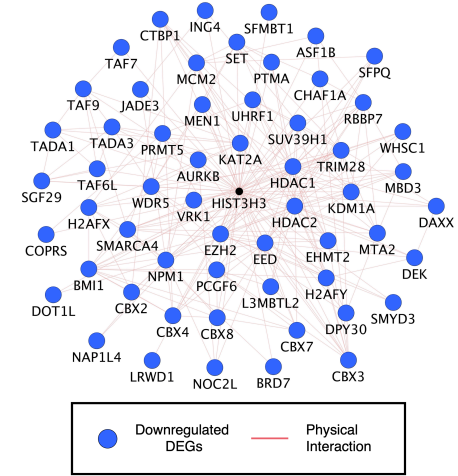

**B**

Global Chromatin Profiling – NPCs (Iso-T vs. Iso-E)

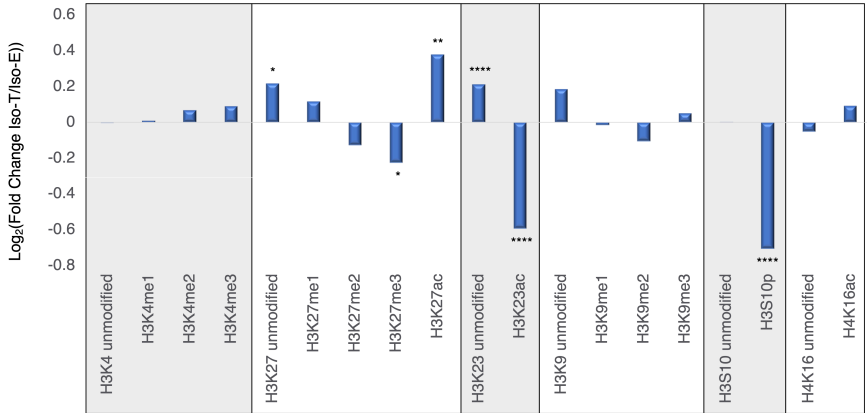

**C**

DARs Distribution iPSC (Iso-T vs. Iso-E)

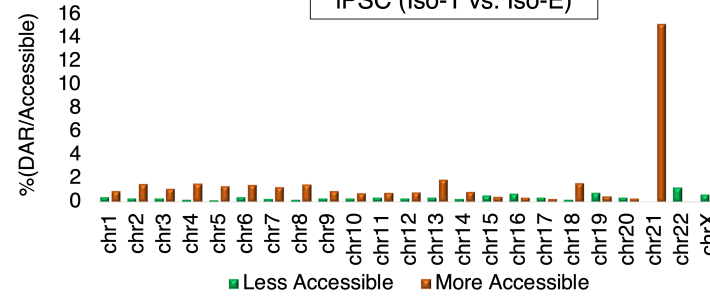

**D**

DARs Distribution NPC (Iso-T vs. Iso-E)

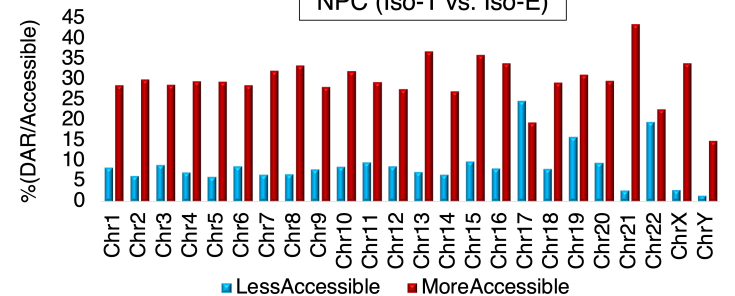

**E**

DARs NPCs wo chr21 (Iso-T vs. Iso-E)

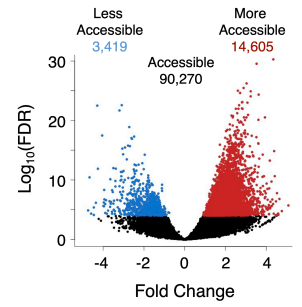

**F**

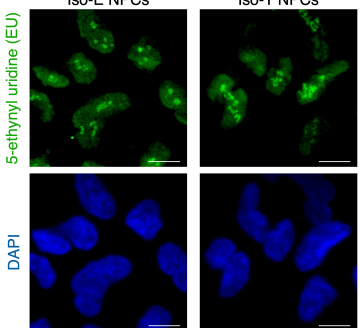

**G**

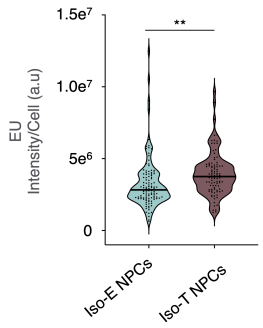

**H**

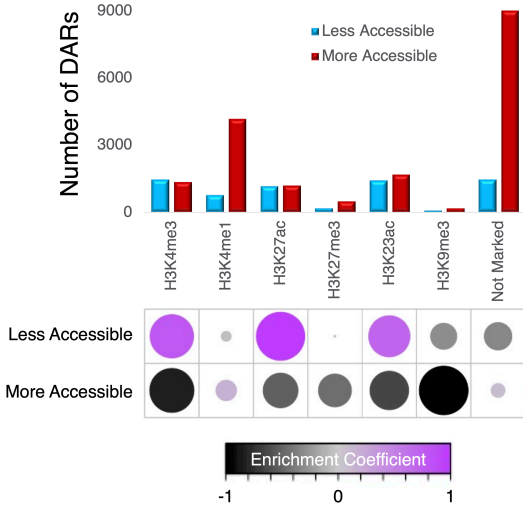

**J**

NPC (Iso-T/Iso-E) Less Accessible Promoters

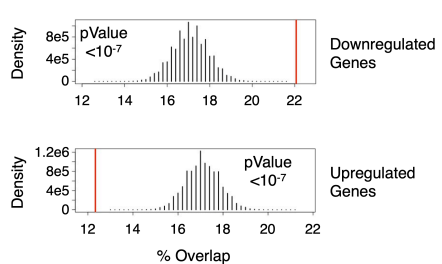

**K**

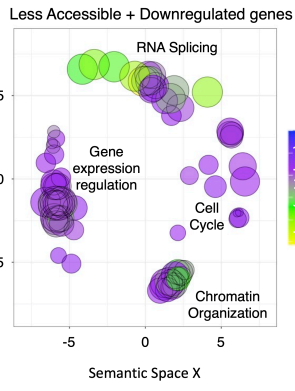

**L**

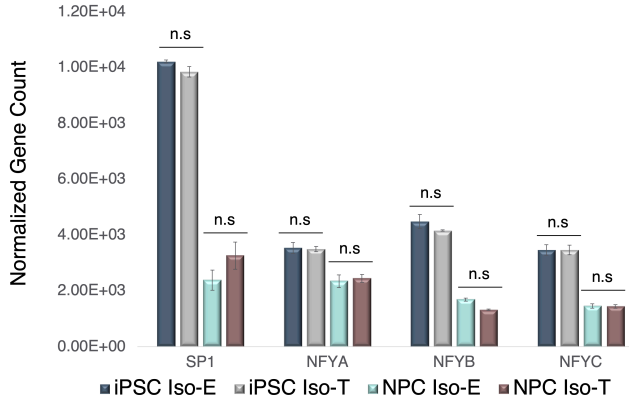

**Figure S5 – T21 induced alterations of chromatin-accessibility is correlated with DEGs in NPCs, Related to Figure 5.** (A) Interactome of downregulated genes (blue circles) associated with the histone H3 pathway. (B) Mass spectrometry-based global chromatin profiling (GCP) analysis of various histone modifications (x-axis) represented as a log<sub>2</sub> fold change (y-axis) of the isogenic pair of NPCs (Iso-T/Iso-E). (C, D) Histogram of the distribution of the percent DARs per chromosome for the isogenic pair (Iso-T vs. Iso-E) of iPSCs (C) and NPCs (D). (E) Volcano plots of the differentially accessible regions (DARs) identified genome-wide in the isogenic pair of NPCs where the data was normalized and processed in the absence of chromosome 21. (F, G) Nascent RNA stained for 5-ethynyl uridine (EU, green) (F) and quantification represented as a violin plot where each dot represents a single cell, three replicates for both Iso-E and Iso-T were analyzed and ~300 cells were analyzed for the isogenic pair of NPCs (G). (H) Histogram of the number of less accessible (blue) or more accessible (red) regions associated with previously published histone modifications in H1-NPCs. (I) Enrichment analysis (10 million randomized permutations) of less and more accessible regions with previously published histone modification ChIP-seq datasets from H1-NPCs. Color intensity (positive correlations are displayed in purple and negative correlations in black) and the size of the circle are proportional to the enrichment coefficients. (J) Randomized permutation correlation analysis between the downregulated (top) and upregulated (bottom) DEGs identified as a consequence of T21 in the isogenic pair (Iso-T vs. Iso-E) of NPCs with differentially accessible promoters. Histogram represents the range of expected overlap percentage and the red lines represent the observed percentage overlap. (K) Gene ontology visualized in semantic similarity-based scatterplots for downregulated genes with less accessible promoters. (L) Histogram of normalized transcript counts for SP1 and the different isoforms of NFY (NFYA, NFYB and NFYC).



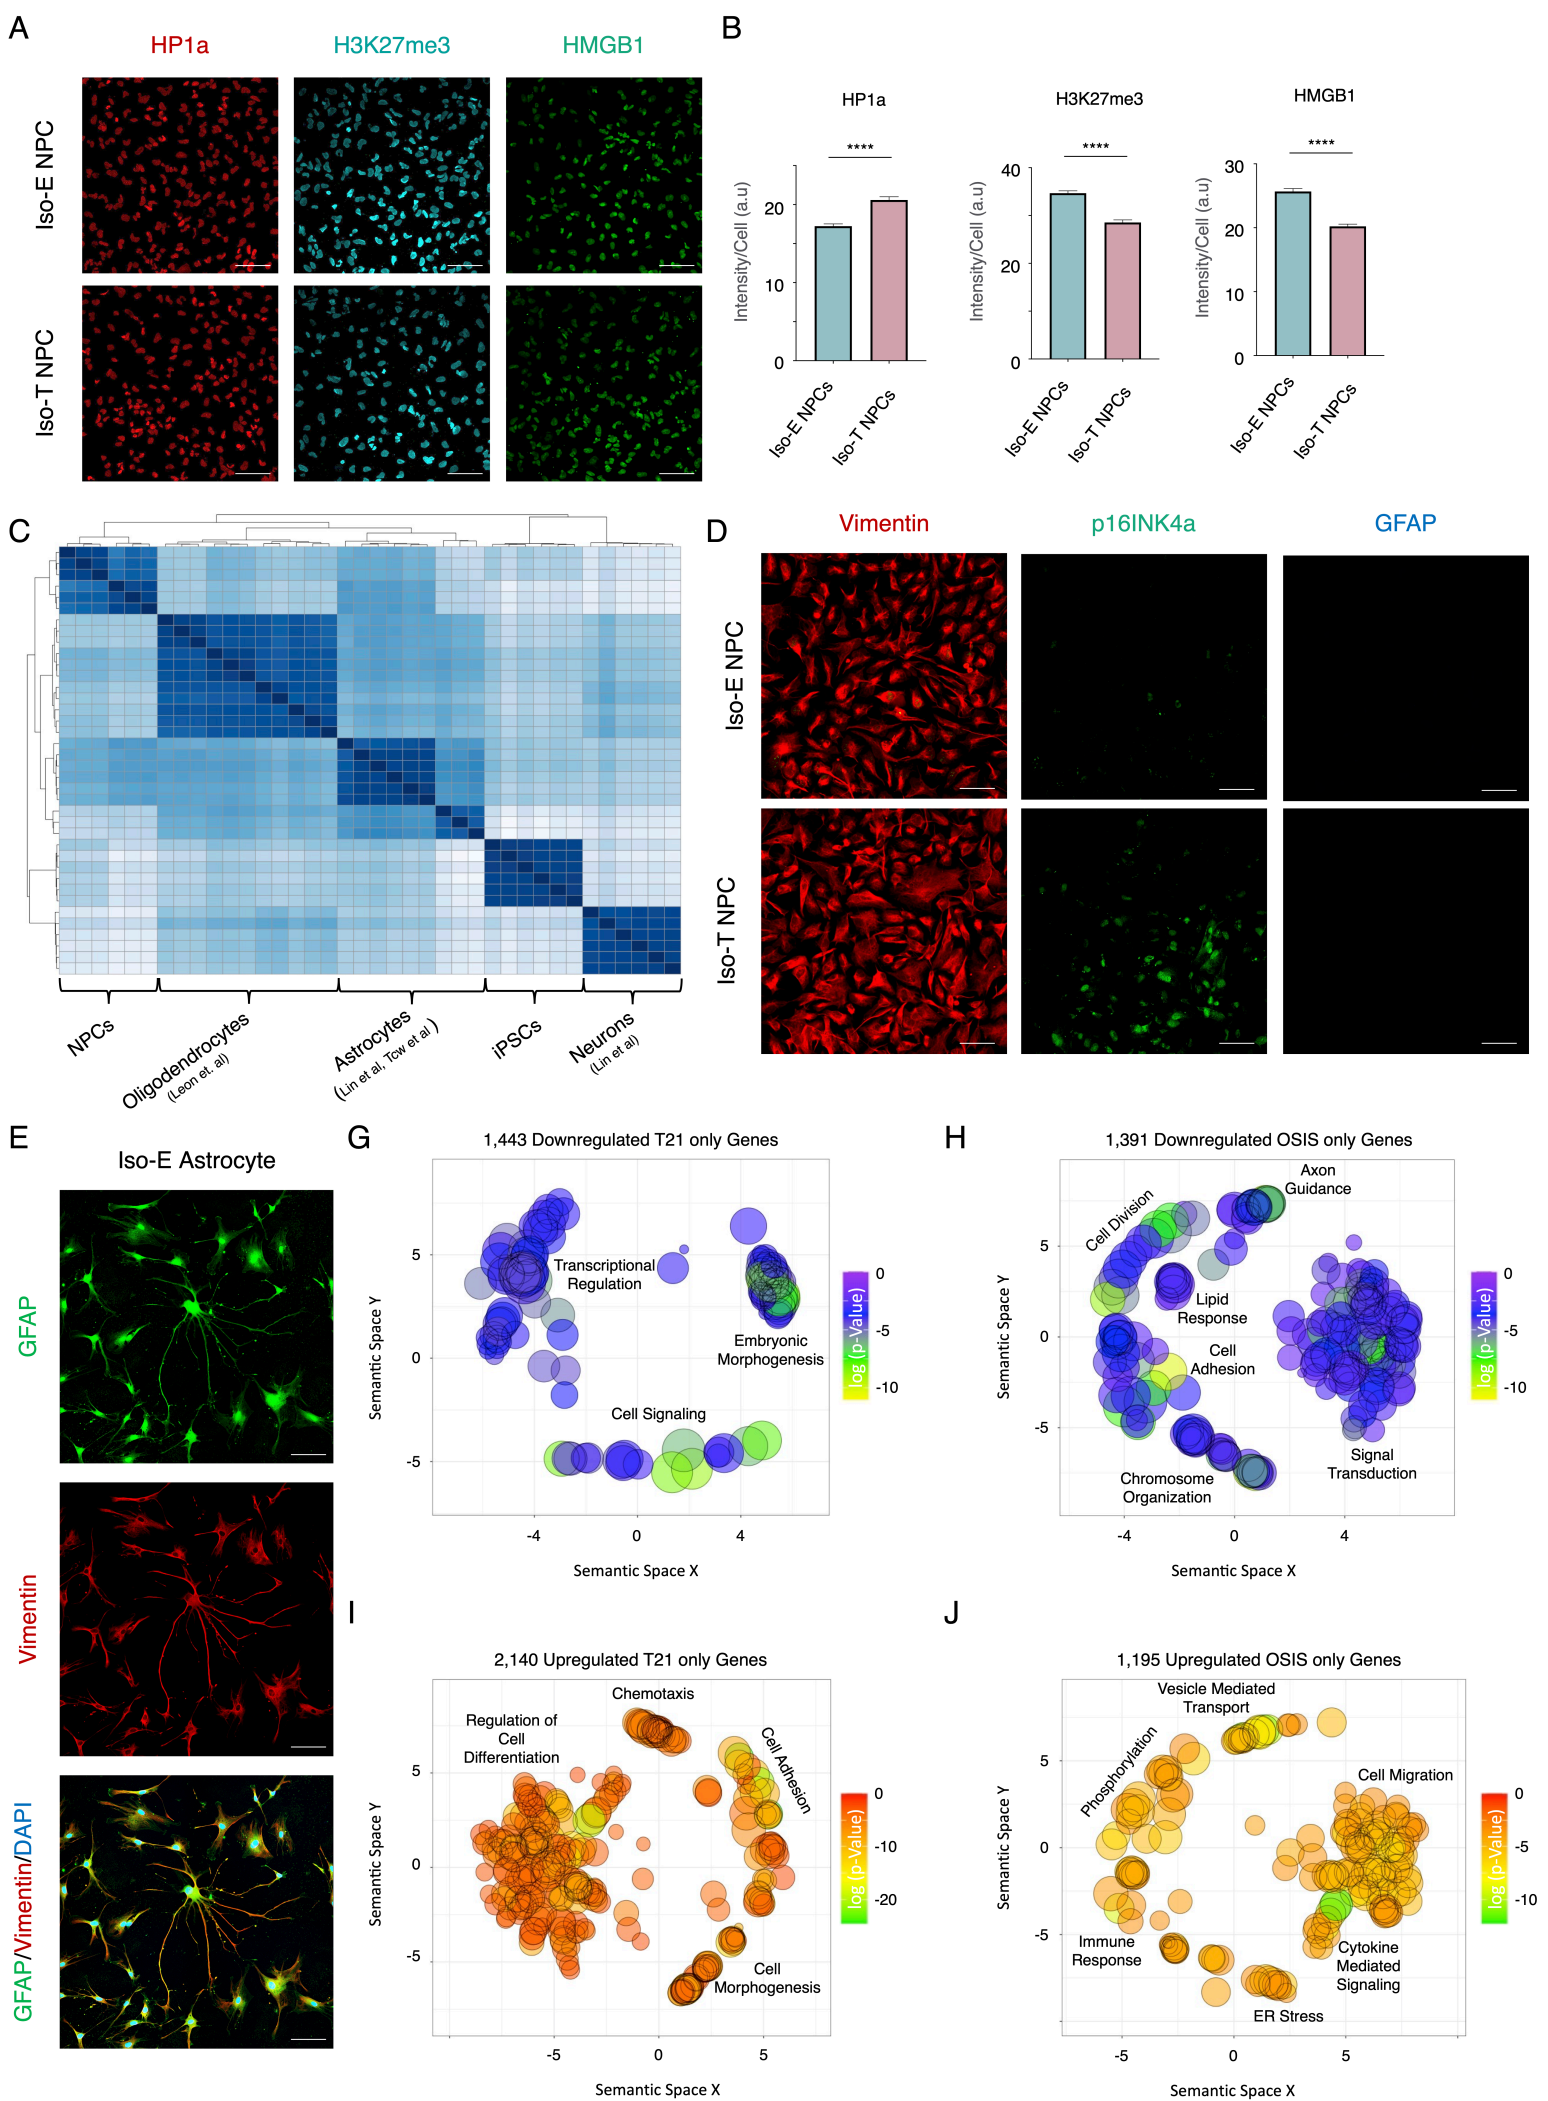

**Figure S6 – T21 induces senescence in NPCs, Related to Figure 6.** (A) Immunofluorescence of HP1a (red, left), H3K27me3 (cyan, middle) and HMGB1 (green, right) in Iso-E (top) and Iso-T (bottom) NPCs. (B) Quantification of HP1a (left), H3K27me3 (middle) and HMGB1 (right) staining mean intensity in the isogenic pair of NPCs. Each dot on the histogram represents a replicate experiment of ~2,000 total nuclei analyzed for the isogenic pair of NPCs. (C) Clustering of genome-wide transcriptomic data of the isogenic pair of iPSCs and NPCs with previously published iPSC derived neurons, astrocytes and oligodendrocytes. (D) Staining to ensure senescent NPCs (p16INK<sup>4a</sup>, green) do not undergo premature astrocytic differentiation (GFAP, blue). Cells were stained for a pan neural marker vimentin (red). (E) Astrocytes derived from euploid NPCs stained for GFAP (green), vimentin (red) and DAPI (blue). (G-J) Gene ontology visualized in semantic similarity-based scatterplots associated with downregulated genes uniquely identified in T21-NPCs (G) and OSIS cells (H), and upregulated genes uniquely identified in T21-NPCs (I) and OSIS cells (J).

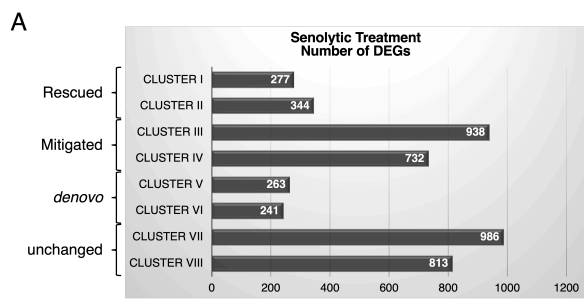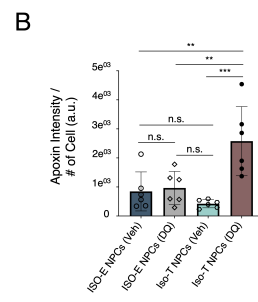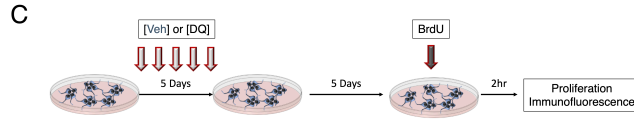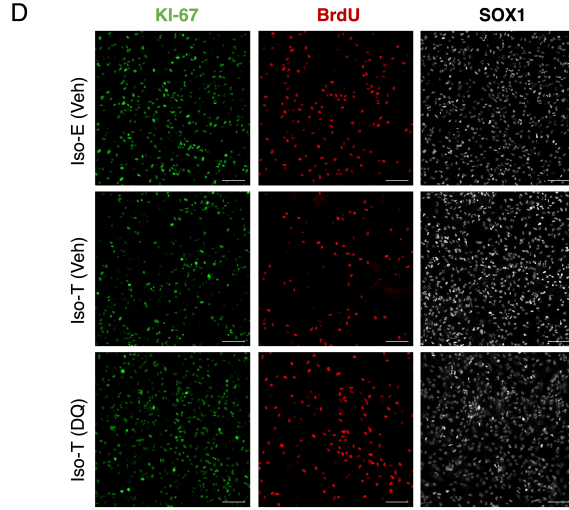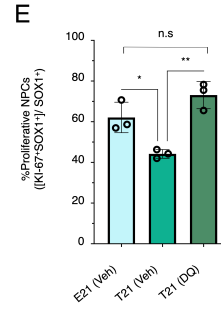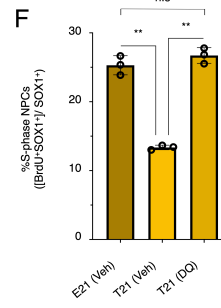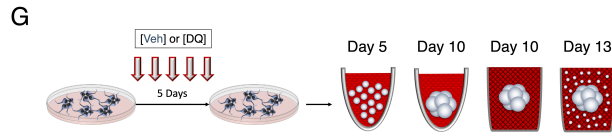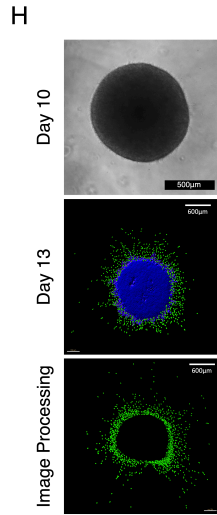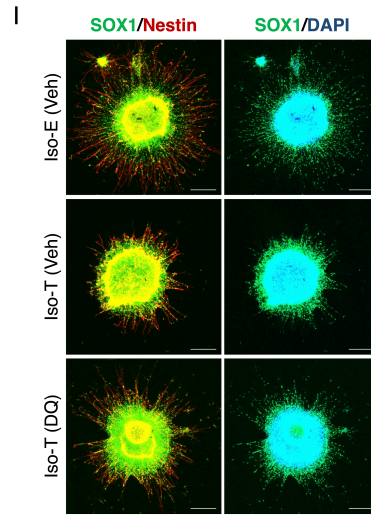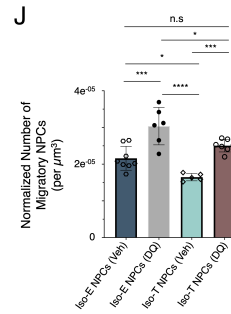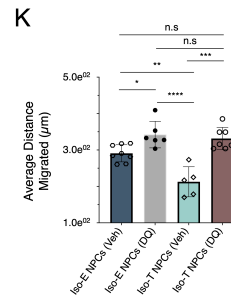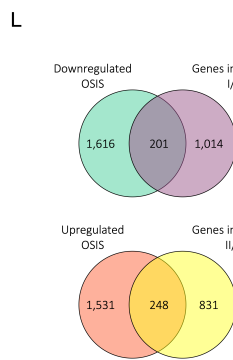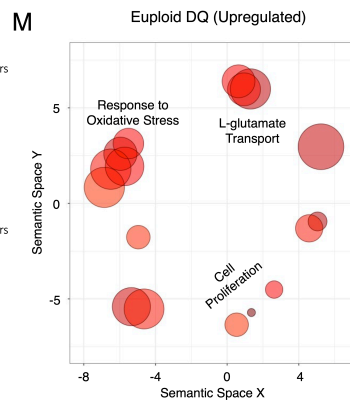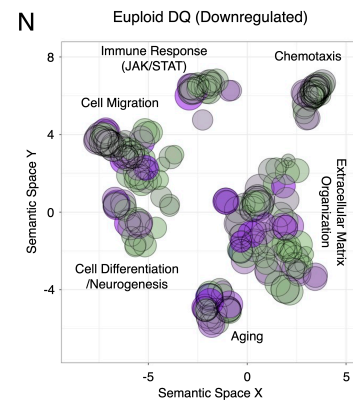

**Figure S7 – Senolytic drug combination of dasatinib and quercetin alleviates the cell migration and proliferation deficits induced by T21 in NPCs, Related to Figure 7.** (A) Number of genes identified in each transcriptional cluster after senolytic drug treatment. (B) Quantification of apoptotic NPCs (Iso-E and Iso-T) after 6hrs of treatment with vehicle or DQ, measured as the average apoxin intensity. (C) Schematic cartoon representation of experimental design to assess cell cycle and proliferation of NPCs before and after senolytic drug treatment. (D) Representative immunofluorescence images of KI-67 (green) and BrdU (red) of euploid (Iso-E) and trisomic (Iso-T), before and after senolytic treatment of NPCs (SOX1 (white)) used to calculate the proliferative and cycling NPCs after senolytic drug treatment. (E) Quantification of the percentage of proliferative NPCs ( $[\text{KI-67}^+\text{SOX1}^+]/\text{SOX1}^+$ ) and (F) NPCs that have traversed through S phase within 2hrs pre assay termination  $[\text{SOX}^+,\text{KI-67}^+,\text{BrdU}^+/\text{SOX}^+,\text{KI-67}^+,\text{BrdU}^+]$ . Each dot on the histogram represents a replicate and ~2,000 NPCs were analyzed per condition. (G) Schematic representation of the 3D cell-migration assay performed on euploid (Iso-E) and trisomic (Iso-T) NPCs treated with vehicle or DQ. (H) Image processing pipeline utilizing Imaris to assess the number and distance of migratory NPCs after senolytic drug treatment. (I) Immunofluorescence of SOX1 (green) and Nestin (red) in DQ-treated trisomic (Iso-T (DQ) bottom), vehicle-treated euploid (Iso-E (veh) top) and trisomic (Iso-T (veh) middle) neurospheres (imaged at 5x objective). (J, K) Quantification of the total number of migratory cells normalized to the total volume of DAPI (J) and average distance traveled by NPCs out of the neurosphere (K). Each dot on the histogram represents 5 neurospheres analyzed per condition and 5,000 -7,000 NPCs were analyzed per condition. (L) Venn diagram of overlapping SA-downregulated (top) and SA-upregulated (bottom) identified in NPCs harboring T21 and compared to genes in clusters ameliorated after DQ treatment. (M, N) Gene ontology visualized in semantic similarity-based scatterplots for upregulated (M) and downregulated (N) genes identified in euploid NPCs after DQ treatment.
